# Supplementary material for: Eggshell geochemistry reveals ancestral metabolic thermoregulation in Dinosauria
Source: PubMed Central journal article supplement — Sci Adv. 2020 Feb 14;6(7):eaax9361. doi: 10.1126/sciadv.aax9361 (PMC7021498; doi:10.1126/sciadv.aax9361), 2020-02-14
Supplement: aax9361_SM.pdf [file aax9361_SM.pdf]

## Supplementary Materials for

### Eggshell geochemistry reveals ancestral metabolic thermoregulation in Dinosauria

Robin R. Dawson\*, Daniel J. Field, Pincelli M. Hull, Darla K. Zelenitsky, François Therrien, Hagit P. Affek

\*Corresponding author. Email: [robin.dawson@yale.edu](mailto:robin.dawson@yale.edu)

Published 14 February 2020, *Sci. Adv.* **6**, eaax9361 (2020)

DOI: [10.1126/sciadv.aax9361](https://doi.org/10.1126/sciadv.aax9361)

#### The PDF file includes:

Supplementary Materials and Methods

Fig. S1. Fossil localities in southern Alberta, Canada.

Fig. S2. Paleogeographic map.

Fig. S3. Clumped isotope [ $\Delta_{47(\text{abs})}$ ] value versus temperature relationship of laboratory-precipitated carbonate calibration data.

Fig. S4. X-ray diffraction spectra of fossil mollusks.

Fig. S5. Photomicrographs of dinosaur eggshell samples.

Legend for data S1

Table S1. Specimen descriptions, localities, and isotopic values.

References (61–75)

#### Other Supplementary Material for this manuscript includes the following:

(available at [advances.sciencemag.org/cgi/content/full/6/7/eaax9361/DC1](https://advances.sciencemag.org/cgi/content/full/6/7/eaax9361/DC1))

Data S1 (Microsoft Excel format). Raw data for both carbonate samples and standards and CO<sub>2</sub> standards.

## SUPPLEMENTARY MATERIALS

### Supplementary Materials and Methods

#### Geological Setting of Fossil Eggshell and Mollusks

We analyzed seven fossil eggshell fragments, representing the three major clades of dinosaurs (Fig. 1; Theropoda, Sauropodomorpha, and Ornithischia). These samples come from upper Campanian deposits of Alberta, Canada (Fig. S1; Theropoda, Ornithischia) and upper Maastrichtian deposits of Transylvania, Romania (Sauropodomorpha or Ornithischia) (Fig. S2). Based on screening for diagenetic alterations described below, two out of the seven eggshell samples are considered poorly-preserved. For the others,  $\Delta_{47}$  values were used to estimate dinosaur body temperatures ( $\Delta_{47}$  is defined in detail below).

Eggshell fragments representing Theropoda (*Troodon formosus*) and Ornithischia (Hadrosaurs: unidentified lambeosaurine, *Hypacrosaurus stebingeri*, and *Maiasaura peeblesorum*) were recovered from the upper Campanian Oldman Formation in southeastern Alberta (Fig. S1) from three distinct localities: Wann's Hill (WH) in the Milk River Natural Area, Little Diablo's Hill at Devil's Coulee (DC), and Lost River Ranch (LRR). All three sites are thought to be roughly contemporaneous (61). The Oldman Formation is part of the Belly River Group, an eastward-thinning clastic wedge deposited in the Western Canada Basin in response to tectonic uplift of the Canadian Cordillera. In southernmost Alberta, the Oldman Formation is over 160 meters thick and consists of interbedded mudstones, siltstones, and sandstones deposited in an ephemeral, low-sinuosity fluvial system (62). Structural dip of the formation is very close to 0° but dips slightly to the west. The prevalence of paleosols containing carbonate nodules and slickensides indicates that the climate at the time was semi-arid to arid and characterized by seasonal precipitation (62), although the presence of hydromorphic paleosols suggests that wetlands were present, at least seasonally (63). Radiometric dating of volcanic ash deposits has

revealed that the upper Oldman Formation of southern Alberta was deposited between 76.2 Ma and 74.9 Ma (62).

All eggshell fragments and fossil mollusk shells come from the same interval of overbank deposits known to produce hadrosaur eggs and embryonic remains (63) and most are catalogued as part of the Royal Tyrrell Museum of Palaeontology (TMP) collection. Eggshells identified as *Maiasaura peeblesorum* (TMP 2009.153.1), *Hypacrosaurus stebingeri* (TMP 1989.69.10), and *Troodon formosus* (TMP 2008.75.127) were recovered from Devil's Coulee (30, 64). Eggshell fragments identified as a 'lambeosaurine hadrosaur' (TMP 1988.121.41) and *Troodon formosus* (TMP 1995.21.4) were recovered from Wann's Hill. An additional *Troodon formosus* eggshell fragment (TMP 2003.81.1) was recovered from Lost River Ranch (Table S1). The three different *Troodon formosus* eggshell fragments allow us to compare  $\Delta_{47}$  results from the same taxon across contemporaneous localities that likely experienced similar paleoenvironmental conditions, but possibly different preservation histories. Vitrinite reflectance analyses of the Campanian-Maastrichtian deposits of the southeastern Alberta plains suggest that these sediments were never heated above 80°C (namely, never reached the oil window; ref. (44)). As such,  $\Delta_{47}$  alteration by solid state diffusion is unlikely in these fossil eggshells and associated mollusks fossils (65).

Mollusks shells from the stratigraphically contemporaneous (upper Oldman Formation) sites were also analyzed to characterize paleoenvironmental temperatures. A freshwater gastropod shell (W20) was collected from Wann's Hill (TMP collection, not yet catalogued). A freshwater bivalve was collected from the southern side of the Milk River Natural Area (TMP 2009.149.5).

Eggshell fragments thought to belong to the oospecies *Megaloolithus cf. siruguei* (TMP 1991.175.2) were collected from the Tuștea locality, which preserves exposures of the Maastrichtian Densuș-Ciula Formation, in the Hațeg Basin of Transylvania, Romania. The eggshell was preserved in red, pedogenically-modified mudstones preserving caliche nodules. The paleosols at this locality exhibit slickensides and carbonate nodules, indicative of a semi-arid to arid climate characterized by seasonal precipitation (66). The sedimentary sequence at Tuștea is indicative of a braided stream with well-drained over-bank deposits (66). It is unlikely that solid state diffusion affected the preservation of the *Magyarosaurus* eggshell as the Maastrichtian Densuș-Ciula Formation was buried only up to 500 m for the last 65 Ma (45) and therefore experienced temperatures well below 100°C (assuming an average geothermal gradient (46) of ~25°C/km) over its burial history.

### **Bulk Trace Metal Concentrations**

Carbonate samples were prepared and analyzed for trace elements in a Picotrace Clean Lab at the Yale Metal Geochemistry Center. In preparation for analysis, powdered samples (~6mg each) were weighed into 1.5 ml acid-cleaned centrifuge tubes and then leached by three 0.5 ml steps of 0.35N HCl in sequence, with each leaching step lasting 1 hour, 30 minutes and 10 minutes, respectively. After each leaching step, the sample was centrifuged and its supernatant combined into sample-specific acid-cleaned Teflon beakers. After completing the leaching, centrifuge tubes with the leached solid were heated on a hotplate at 60°C for three days until dry and then weighed to calculate the carbonate leaching yield. The combined supernatants were heated on a hotplate at 100°C for 12 hours, until dry and then re-dissolved in 5% HNO<sub>3</sub> with a 2ppb Indium spike for trace element analysis. The volume of dilute nitric acid was adjusted for each sample using the carbonate yield data to reach a dilution factor of 1000. These solutions were analyzed by comparison to in-house trace element analytical standards, on a Thermo Element XR ICP-MS. Analytical standard solutions were made in-house using single element

standards to match the typical carbonate trace element range. In addition, sample solutions were measured alongside two geostandards, USGS COQ-1 carbonatite and USGS BHVO-2 basalt standard with a Ca spike to match the matrix of our sample solutions. All standard values were within 5% of their expected values. Procedural blanks were below detection limit with the exception of Zn.

### **CL Images and Color Thresholding Using ImageJ**

We estimate the portion of the sample that is affected by recrystallization or over growth using the ImageJ software (67) with a Fiji platform (68) to analyze the CL images. We set a color threshold using hue, saturation and brightness levers, to select and measure only the number of pixels that glow with some yellow in the images (Fig. S5). Then using a touch screen computer and stylus, we traced the outlines of the whole eggshell in cross-section to measure the total number of pixels that represent the whole shell. This approach assumes that the image of the shell in cross-section is representative of the composition of the whole shell.

### **Clumped isotope ( $\Delta_{47}$ ) analysis**

#### ***Laboratory Protocol and Standardization***

Carbonate clumped isotope thermometry is expressed via the parameter  $\Delta_{47}$  that is related to the temperature of  $\text{CaCO}_3$  formation and is independent of the isotopic composition of the water in which it forms.  $\Delta_{47}$  is a measure of the thermodynamic preference of two heavy isotopes to bind to each other, reflecting the over-abundance of (mostly)  $^{13}\text{C}^{18}\text{O}^{16}\text{O}$  in  $\text{CO}_2$  extracted from  $\text{CaCO}_3$  relative to the abundance expected from the random distribution of  $^{13}\text{C}$  and  $^{18}\text{O}$  among all  $\text{CO}_2$  isotopologues. This relative abundance of  $^{13}\text{C}$ - $^{18}\text{O}$  bonds in the carbonate lattice is temperature-dependent, providing a robust paleothermometer (8, 27).

Eggshell and mollusk shell samples were ground using a mortar and pestle. Powdered carbonate samples (3.5-5mg) were reacted in McCrea type reaction vessels with 1-2ml of 105% phosphoric acid overnight at 25 °C. The extracted CO<sub>2</sub> was cryogenically separated on a vacuum line and passed through a gas chromatograph column (Supelco Q-plot, 30m X 0.53mm) at -20 °C to remove volatile organic compounds (69, 70).

Isotopic analyses were performed at the Yale Analytical and Stable Isotopic Center. Clean CO<sub>2</sub> samples were analyzed for δ<sup>13</sup>C, δ<sup>18</sup>O, and Δ<sub>47</sub> using a Thermo MAT-253 dual inlet gas source isotope ratio mass spectrometer, configured to simultaneously measure masses 44-49. Each sample was analyzed for 90 cycles of sample-reference gas comparison, with 8-second signal integration time. The shot-noise Δ<sub>47</sub> precision limit for samples measured at 16V (for mass 44) is 0.006‰. Samples were analyzed as 3-5 replicates. Analyses were performed in 5 batches: February to April, 2014, May to July, 2014, September, 2014 to April, 2015, May to October, 2015, and May to July 2018 during which five different heated gas lines were used to standardize results. This is aimed to minimize systematic errors associated with short-term variations due to sample preparation and mass spectrometric conditions. See Table S1 for averages of sample replicates and Data S1 for raw values of samples and standards and heated gas lines used for different analytical time periods.

Δ<sub>47</sub> values were calculated from the measured ratios of masses 45, 46, and 47 to mass 44 (R<sup>45</sup>, R<sup>46</sup>, R<sup>47</sup> respectively), relative to the stochastic distribution of all isotopologues (R<sup>45\*</sup>, R<sup>46\*</sup>, R<sup>47\*</sup>) following ref.

(27)

$$\Delta_{47} = \left[ \left( \frac{R^{47}}{R^{47*}} - 1 \right) - \left( \frac{R^{46}}{R^{46*}} - 1 \right) - \left( \frac{R^{45}}{R^{45*}} - 1 \right) \right] \times 1000 \quad (\text{Eq. 1})$$

Standardization of sample CO<sub>2</sub> gas was performed as described in ref. (8).  $\Delta_{47}$  values are converted to the absolute reference frame following the methods outlined in the supplementary material of ref. (58). In addition, internal laboratory standards including Carrera marble (YCM) were analyzed to test for instrument stability and quantify external precision. See Data S1 for raw values of the standards. The long-term average ( $\pm 1$ SD)  $\Delta_{47}$  value in the absolute reference frame ( $\Delta_{47(\text{abs})}$ ) for Carrera marble is  $0.400 \pm 0.028\text{‰}$  (n=49, ref. (71)). The average ( $\pm 1$ SE) Carrera marble  $\Delta_{47(\text{abs})}$  values during the 5 periods of analysis were  $0.407 \pm 0.010\text{‰}$  (n=6),  $0.402 \pm 0.009\text{‰}$  (n=12),  $0.407 \pm 0.008\text{‰}$  (n=20),  $0.401 \pm 0.007\text{‰}$  (n=16) and  $0.418 \pm 0.011\text{‰}$  (n=7) (see Data S1 for raw values). The pooled error on all YCM analyses during these 5 periods (n=60) is  $\pm 0.016\text{‰}$  ( $\pm 1$ SD of residuals). Temperatures were calculated from  $\Delta_{47(\text{abs})}$  values based on the calibration line of laboratory precipitated CaCO<sub>3</sub> produced at Yale (8; Fig. 2). Statistical tests for comparison of  $\Delta_{47}$  values were conducted in PAST (72). Mann-Whitney tests were conducted to compare dinosaurian body temperatures to average mollusk-derived environmental temperatures based on  $\Delta_{47}$  results.

$\delta^{18}\text{O}_{\text{VPDB}}$  and  $\delta^{13}\text{C}_{\text{VPDB}}$  were measured simultaneously as part of the  $\Delta_{47}$  analysis, using an Oztech reference gas CO<sub>2</sub> with a composition of  $\delta^{18}\text{O}_{\text{VPDB}} = -15.80\text{‰}$  and  $\delta^{13}\text{C}_{\text{VPDB}} = -3.64\text{‰}$ . Measurements of NBS-19 result in  $\delta^{18}\text{O}_{\text{VPDB}} = -2.17 \pm 0.04\text{‰}$  and  $\delta^{13}\text{C}_{\text{VPDB}} = +2.11 \pm 0.13 \text{‰}$  (1 SD, n=12), comparable with the recommended IAEA values of  $-2.20 \text{‰}$  and  $1.95 \text{‰}$ , respectively (73). The  $\delta^{18}\text{O}_{\text{VPDB}}$  values of the measured CO<sub>2</sub> were converted to those of carbonate using an acid fractionation factor at  $25^\circ\text{C}$ ,  $\alpha_{\text{CO}_2\text{-calcite}} = 1.01030$  (74).

### *<sup>17</sup>O Correction and Temperature Calibration*

Since there is agreement within the clumped isotope community that reporting  $\Delta_{47}$  values calculated using the Brand parameters for <sup>17</sup>O is preferred, we convert our data (using the equation of ref. (26)) to be based on the Brand parameters, and provide the raw data that will allow future studies to be compared with our results regardless of the parameter set used (see Data S1). The Brand values of Yale internal laboratory standards (YCM, 9-25-G, Cylinder CO<sub>2</sub>) and heated gases were determined based on averages of these standards when measured together with CO<sub>2</sub> equilibrated with water, that in turn serve to define the absolute reference frame. These values were used to convert sample data to the Brand parameters absolute reference frame ( $\Delta_{47(\text{abs})}$ ). The  $\Delta_{47}$  values using Brand parameters for the 3 standards plus the theoretical value of heated gases in the absolute reference frame are 0.396‰, 0.708‰, 0.923‰, and 0.027‰, respectively.

Generally, for samples and standards with  $\delta^{13}\text{C}$  and  $\delta^{18}\text{O}$  close to that of the reference (working) gas the choice of parameters exerts only a small control on  $\Delta_{47}$  (note that the heated gases used at Yale vary in both  $\delta^{13}\text{C}$  and  $\delta^{18}\text{O}$  so that this effect is not a simple function of sample  $\delta^{13}\text{C}$  and  $\delta^{18}\text{O}$ ). For example, the absolute  $\Delta_{47}$  values for samples reported here would shift on average by -0.007‰ when switching from the Gonfiantini to Brand parameter sets (raw  $\Delta_{47}$  data using both parameter sets are given in Data S1). This offset in  $\Delta_{47}$  is close to the typical analytical uncertainty ( $\pm 1\text{SE}$ ; see above). The laboratory precipitation data of ref. (8), on the other hand, shift significantly on average, by +0.021‰, resulting in a mismatch between this calibration and the marine biogenic data after conversion to Brand parameters.

However, due to this mismatch we cannot reasonably use a calibration based on the Brand recalculated laboratory precipitated carbonates to estimate paleotemperatures from biogenic carbonate. We therefore



consider three possible  $\Delta_{47}$  - T calibrations for our Brand parameter dataset. The first is a recently proposed universal  $\Delta_{47}$  - T calibration, based on laboratory-precipitated carbonate (75), the second is the linear fit to biogenic carbonate analyzed over the last 7 years at Yale University ( $\Delta_{47} = (0.0519) \frac{10^6}{T^2} + 0.1125$ ; Fig. S3B), and the third is from a recent clumped isotope thermometer calibration using extant large benthic foraminifera (LBF) measured at Yale University (59) and given in the Brand parameter reference frame ( $\Delta_{47} = (0.0537) \frac{10^6}{T^2} + 0.09$ ). When using either one of these three equations the change in temperature, relative to the original Gonfiantini parameters, is on average less than 1°C (Data S1). We therefore report our data using the Gonfiantini parameters and the Gonfiantini based  $\Delta_{47}$  - temperature calibration (Fig. 2) from ref. (8) in order to enable direct comparison with previously published dinosaur body temperatures (5, 6).

Supplementary Figures

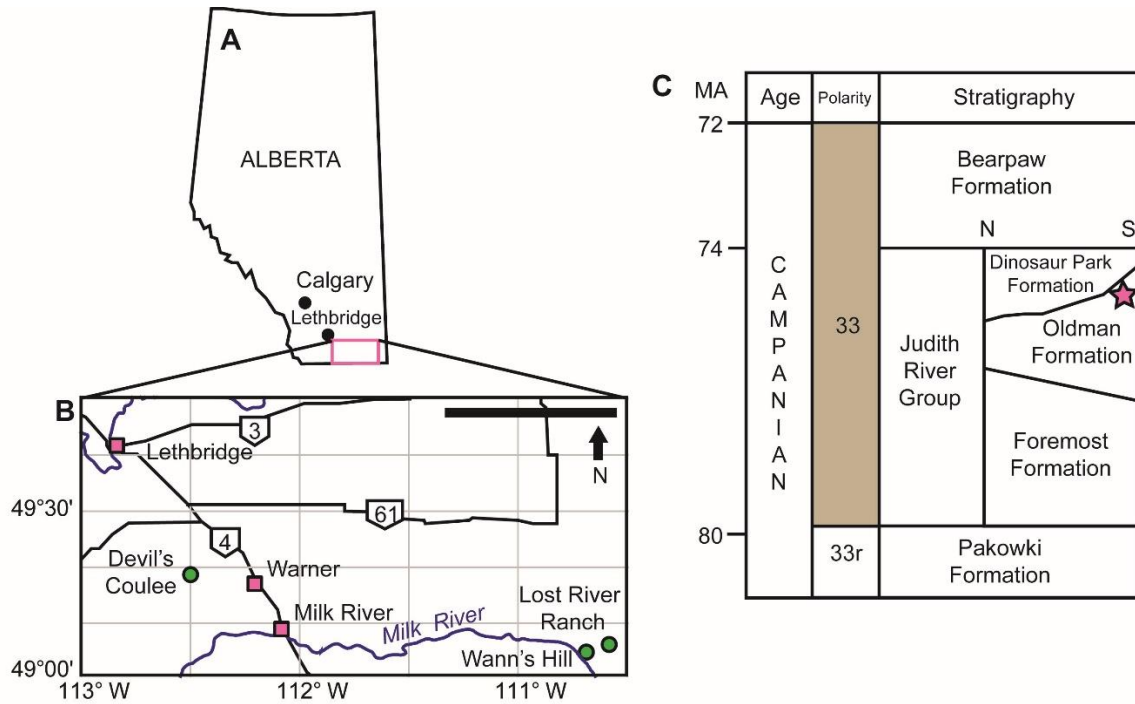

**Fig. S1. A) Fossil localities in southern Alberta, Canada** (pink rectangle in A). **B) Detailed map of pink rectangle inset from (A), showing location of the three fossil sites** (modified from ref. (30)). Scale bar is 50 kilometers. **C) Simplified stratigraphic column indicating age of Oldman Formation** (pink star; ref. (61)).

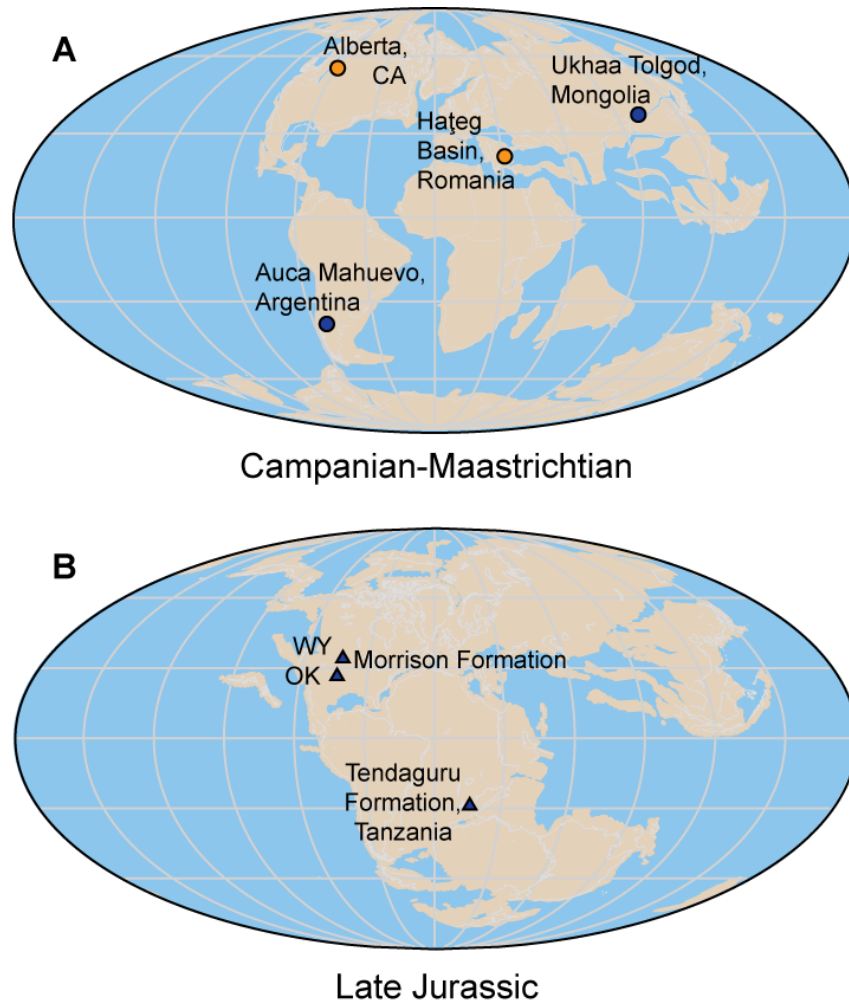

**Fig. S2. Paleogeographic map** reconstruction of the **A**) Campanian-Maastrichtian and **B**) Jurassic (modified from the Paleobiology Database). Localities of samples analyzed in this study are orange and those from previous studies (5, 6) are blue. Localities of sampled fossil eggshell are shown as circles and fossil teeth as triangles.

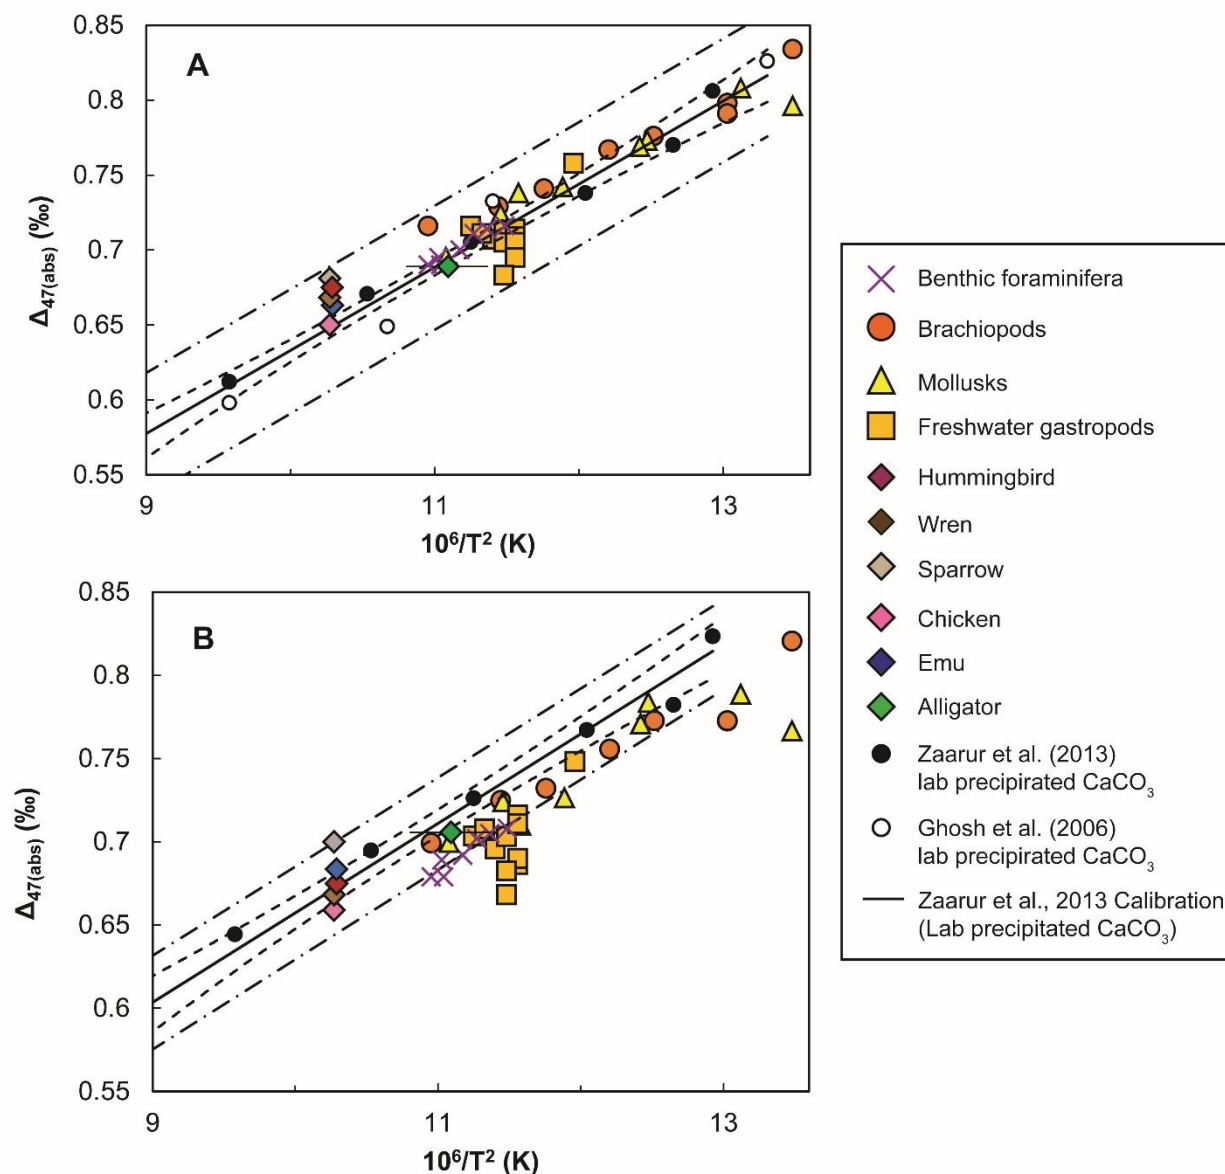

**Fig. S3. Clumped isotope [ $\Delta_{47}(\text{abs})$ ] value versus temperature relationship of laboratory-precipitated carbonate calibration data (8). A) using Gonfiantini parameters and B) same dataset but using Brand parameters. Calibration line (solid), 95% confidence interval (dotted line).  $\Delta_{47}$  data of biogenic carbonates analyzed between 2010-2018 at Yale University (8, 56-59), including our extant eggshells (diamonds), are calculated using either Gonfiantini or Brand parameters, respectively, and shown for comparison.**

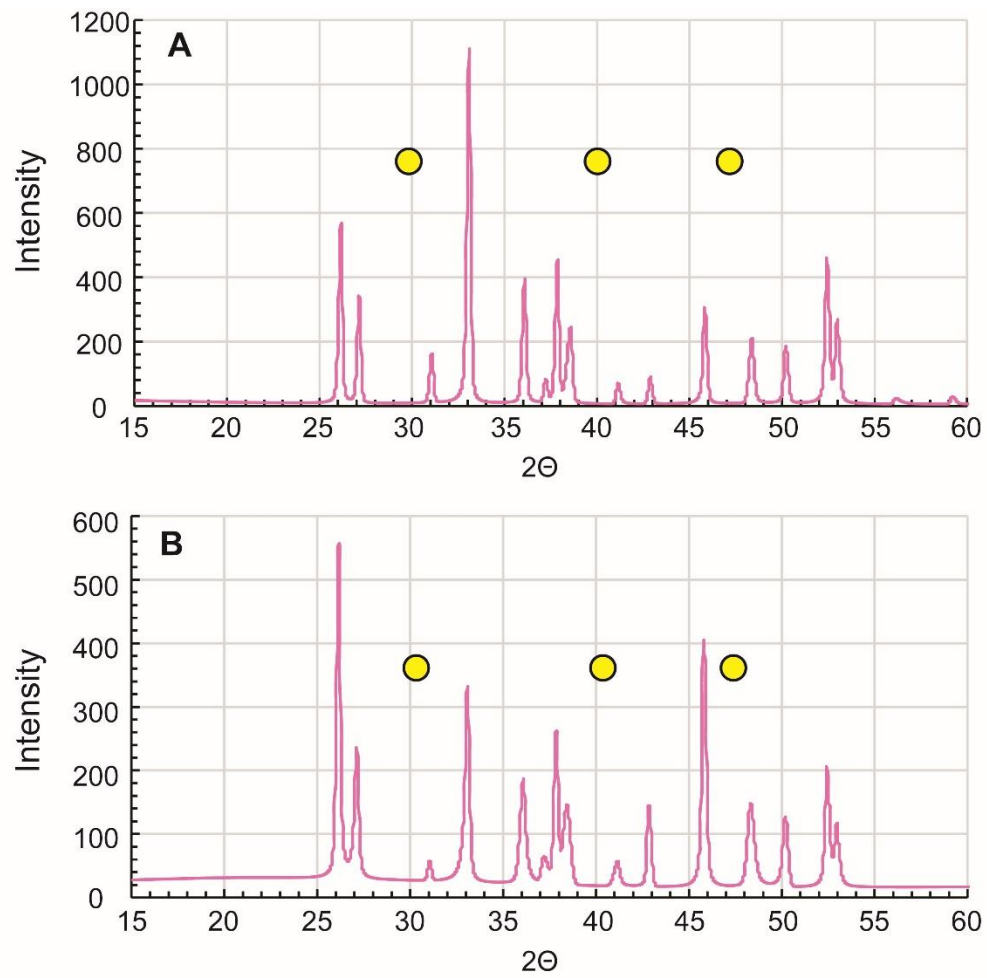

**Fig. S4. X-ray diffraction spectra of fossil mollusks. (A)** Milk River Bivalve (TMP 2009.149.5). **(B)** Wann's Hill Gastropod (TMP uncatologued). Yellow circles indicate where calcite peaks would have appeared if the aragonitic shells had recrystallized to calcite.

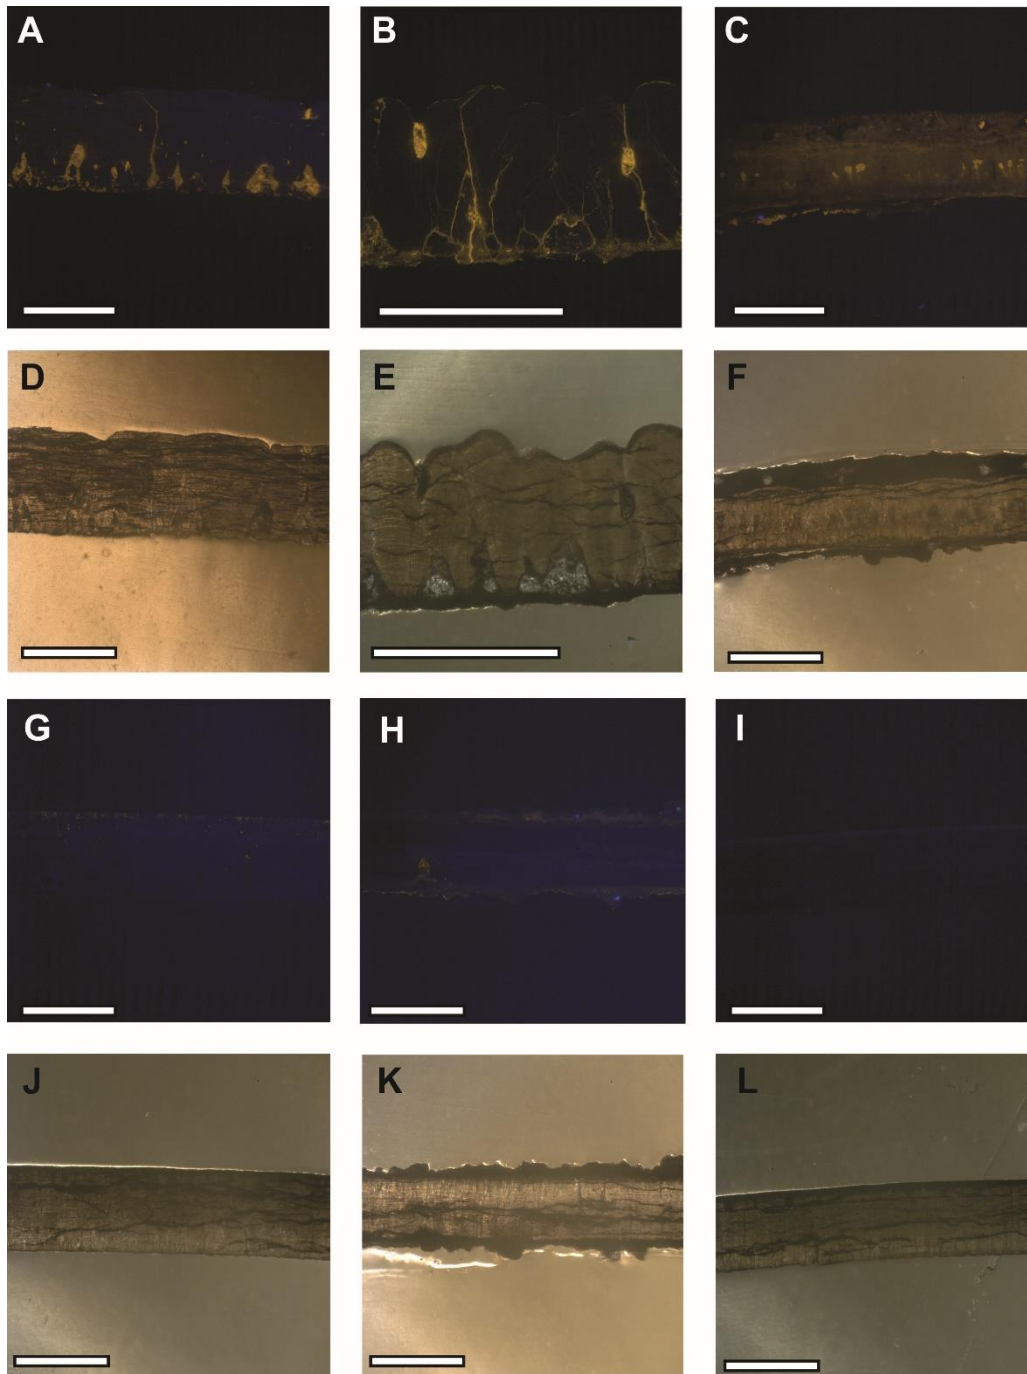

**Fig. S5. Photomicrographs of dinosaur eggshell samples.** Scale bars are all 1 mm. (A-C) Cathodoluminescence (CL) microscopy images of (A) Devil's Coulee *Maiasaura* eggshell, (B) Tuștea, Romania eggshell, (C) Wann's Hill lambeosaurine eggshell. (D-F) Transmitting Plane-Light (PL) microscopy images of (D) Devil's Coulee *Maiasaura* eggshell, (E) Tuștea, Romania eggshell, (F) Wann's Hill lambeosaurine eggshell. (G-I) CL microscopy images of (G) Devil's Coulee *Troodon* eggshell, (H) Wann's Hill *Troodon* eggshell, (I) Lost River Ranch *Troodon* eggshell. (J-L) PL microscopy images of (J) Devil's Coulee *Troodon* eggshell, (K) Wann's Hill *Troodon* eggshell, (L) Lost River Ranch *Troodon* eggshell.

**Table S1. Specimen descriptions, localities, and isotopic values.**

| Eggshell                                                                           | Locality                                  | Age       | Paleolatitude | Analytical Replicates | $\delta^{13}\text{C}_{\text{vpdb}} (\text{‰})$ | $\delta^{18}\text{O}_{\text{vpdb}} (\text{‰})$ | $\Delta_{47(\text{abs})}^*$ | T (°C) <sup>†</sup> |
|------------------------------------------------------------------------------------|-------------------------------------------|-----------|---------------|-----------------------|------------------------------------------------|------------------------------------------------|-----------------------------|---------------------|
| <i>Alligator mississippiensis</i><br>YPM HERR<br>015203                            | Rockefeller<br>Wildlife<br>Refugee,<br>LA | Modern    | NA            | 5                     | -12.38 ±<br>0.02                               | -3.06 ± 0.04                                   | 0.689 ± 0.003               | 28.2 ±<br>0.8       |
| <i>Dromaius novaehollandiae</i><br>(Emu)                                           | Gill, MA                                  | Modern    | NA            | 6                     | -8.2 ± 0.06                                    | -8.42 ± 0.06                                   | 0.663 ± 0.008               | 35 ± 2.2            |
| <i>Gallus gallus</i><br>(Chicken)                                                  | New<br>Haven, CT                          | Modern    | NA            | 6                     | 0.15 ± 0.01                                    | -6.61 ± 0.05                                   | 0.650 ± 0.006               | 38.4 ±<br>1.7       |
| <i>Passer domesticus</i><br>(House Sparrow)<br>YPM ORN<br>uncatalogued             | New<br>Haven, CT                          | Modern    | Na            | 5                     | -10.82 ±<br>0.06                               | -2.68 ± 0.10                                   | 0.682 ± 0.004               | 30 ± 1.1            |
| <i>Troglodytes aedon</i><br>(House Wren)<br>YPM ORN<br>uncatalogued                | Iowa                                      | Modern    | NA            | 3                     | -12.31 ±<br>1.47                               | -4.66 ± 0.23                                   | 0.668 ± 0.013               | 33.6 ±<br>3.3       |
| <i>Archilochus colubris</i><br>(Ruby-throated<br>Hummingbird)<br>YPM ORN<br>132487 | New<br>Haven, CT                          | Modern    | NA            | 3                     | -12.84 ±<br>0.89                               | -4.82 ± 0.23                                   | 0.675 ± 0.013               | 31.9 ±<br>3.2       |
| <i>Troodon formosus</i><br>(Theropod)<br>TMP 2008.75.127                           | Devil's<br>Coulee,<br>AB Canada           | Campanian | 55 °N         | 6                     | -11.5 ± 0.01                                   | -11.15 ±<br>0.03                               | 0.653 ± 0.014               | 37.8 ±<br>3.8       |
| <i>Maiasaura peeblesorum</i><br>(Hadrosaur)<br>TMP 2009.153.1                      | Devil's<br>Coulee,<br>AB Canada           | Campanian | 55 °N         | 5                     | -12.01 ±<br>0.04                               | -14.39 ±<br>0.03                               | 0.632 ± 0.009               | 43.6 ±<br>2.4       |
| <i>Hypacrosaurus stebingeri</i><br>(Hadrosaur)<br>TMP 1989.69.10                   | Devil's<br>Coulee,<br>AB Canada           | Campanian | 55 °N         | 5                     | -9.33 ± 0.04                                   | -10.67 ±<br>0.07                               | 0.681 ± 0.012               | 30.4 ±<br>3.0       |
| <i>Troodon formosus</i><br>(Theropod)<br>TMP 1995.21.4                             | Wann's Hill,<br>AB Canada                 | Campanian | 55 °N         | 6                     | -11.02 ±<br>0.03                               | -9.46 ± 0.11                                   | 0.691 ± 0.012               | 28.1 ±<br>2.8       |
| Indeterminate<br>lambeosaurine<br>(Hadrosaur)<br>TMP 1988.121.41                   | Wann's Hill,<br>AB Canada                 | Campanian | 55 °N         | 4                     | -10.68 ±<br>0.01                               | -9.11 ± 0.14                                   | 0.691 ± 0.009               | 27.7 ±<br>2.2       |
| <i>Troodon formosus</i><br>(Theropod)<br>TMP 2003.81.1                             | Lost River<br>Ranch,<br>AB Canada         | Campanian | 55 °N         | 4                     | -9.61 ± 0.04                                   | -9.37 ± 0.24                                   | 0.695 ± 0.017               | 27.0 ±<br>4.0       |

**Table S1 cont. Locality information and isotopic values of modern and fossil samples.**

| Eggshell                                                      | Locality                              | Age           | Paleolatitude | Analytical Replicates | $\delta^{13}\text{C}_{\text{vpdb}}$ (‰) | $\delta^{18}\text{O}_{\text{vpdb}}$ (‰) | $\Delta_{47(\text{abs})}$ * | T (°C) †   |
|---------------------------------------------------------------|---------------------------------------|---------------|---------------|-----------------------|-----------------------------------------|-----------------------------------------|-----------------------------|------------|
| <i>Magyarosaurus dacus</i><br>(Sauropod)<br>TMP<br>1991.175.2 | Tuștea,<br>Hațeg<br>Basin,<br>Romania | Maastrichtian | 23 °N         | 3                     | -13.08 ± 0.30                           | -1.89 ± 0.08                            | 0.660 ± 0.004               | 35.6 ± 1.0 |
| Gastropod<br>W20                                              | Wann's<br>Hill,<br>AB<br>Canada       | Campanian     | 55 °N         | 3                     | -1.93 ± 0.01                            | -9.52 ± 0.03                            | 0.704 ± 0.006               | 24.6 ± 1.4 |
| Bivalve<br>TMP<br>2009.149.5                                  | Milk River,<br>AB<br>Canada           | Campanian     | 55 °N         | 3                     | -1.13 ± 0.01                            | -17.49 ± 0.10                           | 0.692 ± 0.006               | 27.5 ± 1.6 |

\*All  $\Delta_{47(\text{abs})}$  values calculated using Gonfiantini parameters and reported with  $\pm 1$  standard error, whereas  $\delta$  value averages are reported with  $\pm 1$  s.d.

† Temperatures calculated from laboratory precipitated  $\text{CaCO}_3$  calibration of ref. (8).

### Caption for Data S1. (Separate file).

**Raw data for both carbonate samples and standards and  $\text{CO}_2$  standards** used to put sample unknowns into the absolute reference frame, such as heated gases, equilibrated gases and cylinder  $\text{CO}_2$ . Raw data is calculated using both Gonfiantini and Brand  $^{17}\text{O}$  parameters, with separate tabs for each as well as separate tabs corresponding to samples, heated gases and other standards.
